1 **Characteristics of SARS-CoV-2 Positive Individuals in California From Two**  
2 **Periods During Notable Decline in Incident Infection**

3 Lao-Tzu Allan-Blitz,<sup>1</sup> Isaac Turner,<sup>2</sup> Fred Hertlein,<sup>2</sup> Jeffrey D. Klausner<sup>3</sup>

4

5 1. Brigham and Women's Hospital, Boston, MA

6 2. Curative Inc. San Dimas, CA

7 3. Department of Preventive Medicine, Keck School of Medicine, University of  
8 Southern California, Los Angeles, CA

9

10 Disclosures: Dr. Allan-Blitz served as a consultant for Curative Inc., Fred Hertlein is an  
11 employee of Curative Inc., Isaac Turner is a Co-Founder and Chief Information Officer  
12 of Curative Inc., and Dr. Klausner is the medical director of Curative Inc.

13

14 Funding and Acknowledgements: The authors would like to acknowledge the cities of  
15 Los Angeles, Riverside, San Mateo, Berkeley, Menlo Park, Maywood, and Rancho  
16 Mirage. There was no funding for this project.

17

18 Abstract Word Count: 99/100

19 Word Count: 1,323/1,500

20 References: 15/15

21 Tables: 1

22 Figures: 1

23

24 **Corresponding Author Contact Information:**

25 Lao-Tzu Allan-Blitz

26 Department of Medicine, Brigham and Women's Hospital

27 75 Francis Street

28 Boston, MA 02115, USA

29 Email: [lallan-blitz@partners.org](mailto:lallan-blitz@partners.org), phone: (805) 896-5313

30

31 **Alternative Author Information:**

32 Dr. Jeffrey D. Klausner

33 Department of Preventive Medicine

34 Keck School of Medicine

35 University of Southern California

36 Los Angeles, CA 90033, USA

37 Email: [jdklausner@med.usc.edu](mailto:jdklausner@med.usc.edu)

38

39

40 **Abstract**

41 Despite declining SARS-CoV-2 incidence, continued epidemic monitoring is warranted.  
42 We collected SARS-CoV-2 test results from 150 drive-through testing centers across  
43 California from two observation periods: February 23<sup>rd</sup>-March 3<sup>rd</sup> 2021 and April 15<sup>th</sup>-  
44 April 30<sup>th</sup> 2021. We assessed SARS-CoV-2 positivity, stratified by Hispanic heritage  
45 among sociodemographic characteristics and potential exposures. We analyzed  
46 114,789 test results (5.1% and 2.6% positive during the respective observation periods).  
47 Nearly half of all positive tests were among testers reporting a recent exposure (48.8%  
48 and 45.3% during the respective observation periods). Those findings may provide  
49 insight into evolving local transmission dynamics and support targeted public health  
50 strategies.

51 **Key Words:** SARS-CoV-2; Epidemiology; California

## 52 **Introduction**

53 Over the last few months, the daily incidence of SARS-CoV-2 cases has declined  
54 sharply in California (1), as well as in many parts of the United States. The cause of the  
55 dramatic decline is likely multifactorial but greatly influenced by population-level  
56 immunity due to prior infection and increasing vaccination coverage (see Figure) (2).

57 SARS-CoV-2, however, continues to be transmitted heterogeneously among  
58 different subsets of the population (3), and over the last few months several states  
59 reported resurging case counts (1). Fears that certain variants of SARS-CoV-2 (4) may  
60 escape immunity warrant continued epidemic monitoring. We aimed to characterize  
61 characteristics of those with SARS-CoV-2 positive test results during the recent decline  
62 in cases in California to understand current viral transmission.

63

## 64 **Methods**

65 We evaluated SARS-CoV-2 polymerase chain reaction (PCR) test results from a  
66 large testing program in California at two time periods: 1) February 23<sup>rd</sup> - March 3<sup>rd</sup>  
67 2021, and 2) between April 15<sup>th</sup> - April 30<sup>th</sup> 2021. Individuals presented for testing to any  
68 of 150 drive-through publicly accessible sites located in various counties and cities  
69 including Los Angeles, Riverside, San Mateo, Berkeley, Menlo Park, Maywood, and  
70 Rancho Mirage. Those who completed testing were asked via a confidential online  
71 survey if in the last 14 days they had been contacted by local public health authorities  
72 about a known SARS-CoV-2 exposure, they visited any of a list of public places, or  
73 spent time with five or more strangers, as well as demographic information, employment  
74 information, and report of any symptoms at the time of testing.

75 Self-collected oral swabs, which have been shown to perform similarly to  
76 clinician-collected nasopharyngeal swabs (5), were processed with standard PCR  
77 methods using a modified Center for Disease Control and Prevention testing protocol as  
78 has been previously reported (6). We then conducted a cross-sectional analysis to  
79 determine the frequency of infection among testers based on each of the above  
80 characteristics. Further, we calculated positivity ratios by various characteristics to  
81 evaluate trends in SARS-CoV-2 positivity during a period of notable decline in incident  
82 infection. To account for confounding of Hispanic heritage, given the reports of the  
83 disproportionate burden of infection among Hispanic persons (7), we stratified our  
84 analysis by heritage. The Mass General Brigham institutional review board deemed the  
85 analysis of de-identified data did not constitute human subjects' research  
86 (2020P003530). All analyses were conducted using STATA 15.1 (StataCorp, College  
87 Station, TX).

88

## 89 **Results**

90 We analyzed 114,789 test results (see Table). Of 52,9078 results between  
91 February 23<sup>rd</sup> - March 3<sup>rd</sup>, 2021 2,679 (5.1%) were positive. Of 61,882 test results from  
92 April 15<sup>th</sup> - 30<sup>th</sup>, 1,579 (2.6%) were positive. Testers included 47.9% who identified with  
93 Hispanic heritage, and 54.6% reported female sex.

94 In the first period, the positivity of SARS-CoV-2 infection was higher among  
95 Hispanic (7.6%) compared to non-Hispanic (2.8%) testers ( $p$ -value<0.001). In the  
96 second period, the positivity of SARS-CoV-2 infection among Hispanic testers was 3.0%  
97 compared to 2.0% among non-Hispanic Individuals ( $p$ -value=0.09). Of all who tested

98 positive in the first period 1,309 (48.8%) reported contact with an individual known to be  
99 infected with SARS-CoV-2 in the last 14 days. In the second period, a similar  
100 proportion, 715 (45.3%) of the 1,579 individuals who tested positive reported exposure  
101 to a known contact in the last 14 days.

102 Among Hispanic testers during the first period, we found a high positivity of  
103 infection among children (11.8%) and those who reported mixed Native Hawaiian or  
104 Pacific Island and Hispanic heritage (6.5%). We found consistently elevated positivity  
105 through both periods among individuals reporting any known exposure in the past 14  
106 days (16.1% and 10.2%, respectively), individuals reporting employment as disability  
107 care providers (5.5% and 5.5%, respectively), food service providers (8.6% and 3.7%,  
108 respectively), and employment in retail or manufacturing (8.3% and 3.9%, respectively).

109 Among non-Hispanic testers, we found consistently elevated SARS-CoV-2  
110 positivity among individuals reporting employment in retail or manufacturing in both  
111 periods, periods (3.9% and 2.6%, respectively) as well as among testers reporting any  
112 known exposure in the past 14 days (10.2% and 10.6%, respectively).

113

## 114 **Discussion**

115 We evaluated sociodemographic characteristics and potential exposures among  
116 those presenting for SARS-CoV-2 testing during two periods of notable decline in  
117 incident cases in California. The current trends in SARS-CoV-2 case rates across the  
118 United States are at an uncertain point, with several states reporting continued declines,  
119 while some are experiencing a resurgence (1). An epidemiologic understanding of those  
120 most at risk for infection is essential as the transmission dynamics shift, in order to

121 guide future prevention efforts toward those at ongoing risk. Prevention programs  
122 should include vaccination, and among those unvaccinated continued employment-  
123 based regular testing, ventilation, indoor mask use and distancing. We identified notable  
124 SARS-CoV-2 positivity among testers of Hispanic heritage and those reporting a recent  
125 known exposure.

126 Nearly half of infections in our testing population were among individuals who  
127 reported contact with someone known to be infected with SARS-CoV-2 in the last 14  
128 days. A finding which persisted through both periods. Thus, contact tracing efforts,  
129 perhaps now more than ever, are essential for identifying and isolating remaining cases,  
130 and testing and quarantine of those exposed(8). Incorporation of detailed exposure  
131 reporting into contact tracing efforts may also facilitate real-time monitoring of the  
132 variations in risk exposures. The collection of more specific exposure data from both  
133 infected and uninfected persons undergoing testing should be added as a crucial  
134 strategy moving forward (9). Additionally, continuing to encourage testing and  
135 vaccination among individuals with a known exposure will be essential.

136 We found high test positivity among Hispanic testers, and among children  
137 specifically during the first period, supporting the key role of within household  
138 transmission (10). Because schools were mostly closed during the initial observation  
139 period in California, and the reopening of schools predominantly overlapped with the  
140 second observation period, it is unlikely that school attendance is contributing to the  
141 continued spread of infection. Household crowding among Hispanic individuals is  
142 common with higher average number of individuals per room with multiple generations  
143 (11), likely contributing more substantially substantial intra-familial transmission.

144           The disparities noted in SARS-CoV-2 positivity among testers identifying as  
145 individuals of mixed minority heritage are consistent with recent studies (7, 12, 13),  
146 which likely reflects systemic structural inequities that continue to put certain  
147 populations at increased risk of exposure due to inadequate protections. Particularly  
148 among individuals of Hispanic heritage, types of employment likely play a key role in  
149 sustained transmission (14). Our findings suggest that prevention strategies may benefit  
150 from focusing on employers in particular those employing food service workers and  
151 disability care providers. Disability care providers are a particularly important population  
152 as the morbidity and mortality of SARS-CoV-2 infection are substantial among  
153 individuals of long-term care facilities (15). Thus, we encourage requiring vaccination  
154 among such employment categories. Further research is still needed to both clarify the  
155 specific exposures within different sub-populations that may contribute to sustained  
156 transmission, as well as to address the underlying structural inequities that result in the  
157 disparities identified.

158           Our study had several limitations. First, we analyzed laboratory-based testing  
159 data and could not account for individuals with repeat testing. Second, we were unable  
160 to collect detailed socioeconomic data like household size in order to control for  
161 confounding factors. Data collection was also incomplete for some fields making further  
162 statistical analyses and modeling not possible. However, the strengths of our study  
163 were the very large sample size, thus improving precision of our results, the unbiased  
164 collection of exposure data prior to receiving testing results, and the inclusion of  
165 numerous testing sites across California, improving the generalizability of our results.

166



167 **Conclusions**

168           We report SARS-CoV-2 positivity by sociodemographic employment and various  
169 exposure characteristics in California from two observation periods during a notable  
170 decline in incident infection. We found higher SARS-CoV-2 positivity among Hispanic  
171 testers as well as testers with a known recent exposure, as well as variations in  
172 positivity by type of employment. Those findings are important because of the evolving  
173 epidemiology of those at risk as the incidence of infection decreases, thus providing the  
174 groundwork for future research and potentially informing public health strategies.

175

176 **References**

- 177 1. Centers for Disease Control and Prevention. COVID Data Tracker: United States  
178 COVID-19 Cases and Deaths by State. Last updated April 2nd 2021. Available at:  
179 [https://covid.cdc.gov/covid-data-tracker/#cases\\_casesper100klast7days](https://covid.cdc.gov/covid-data-tracker/#cases_casesper100klast7days) Accessed April  
180 4th, 2021.
- 181 2. U.S. COVID Risk & Vaccine Tracker. Available at:  
182 <https://covidactnow.org/?s=1793712> Last Accessed April 29th, 2021.
- 183 3. Centers for Disease Control and Prevention. COVID Data Tracker: Integrated  
184 County View. Available at: [https://covid.cdc.gov/covid-data-](https://covid.cdc.gov/covid-data-tracker/?CDC_AA_refVal=https%3A%2F%2Fwww.cdc.gov%2Fcoronavirus%2F2019-ncov%2Fcases-updates%2Fcases-in-us.html#county-view)  
185 [tracker/?CDC\\_AA\\_refVal=https%3A%2F%2Fwww.cdc.gov%2Fcoronavirus%2F2019-](https://covid.cdc.gov/covid-data-tracker/?CDC_AA_refVal=https%3A%2F%2Fwww.cdc.gov%2Fcoronavirus%2F2019-ncov%2Fcases-updates%2Fcases-in-us.html#county-view)  
186 [ncov%2Fcases-updates%2Fcases-in-us.html#county-view](https://covid.cdc.gov/covid-data-tracker/?CDC_AA_refVal=https%3A%2F%2Fwww.cdc.gov%2Fcoronavirus%2F2019-ncov%2Fcases-updates%2Fcases-in-us.html#county-view) Accessed 5/9/21. 2020.
- 187 4. Galloway SE, Paul P, MacCannell DR, et al. Emergence of SARS-CoV-2 B.1.1.7  
188 Lineage - United States, December 29, 2020-January 12, 2021. MMWR Morb Mortal  
189 Wkly Rep. 2021;70(3):95-9.
- 190 5. Food and Drug Administration. Accelerated Emergency Use Authorization  
191 Summary: Curative SARS-CoV-2 Assay. Table 11. Available at:  
192 <https://www.fda.gov/media/137089/download> Accessed March 24, 2021.
- 193 6. Kojima N, Turner F, Slepnev V, et al. Self-Collected Oral Fluid and Nasal Swab  
194 Specimens Demonstrate Comparable Sensitivity to Clinician-Collected Nasopharyngeal  
195 Swab Specimens for the Detection of SARS-CoV-2. Clin Infect Dis. 2020.
- 196 7. Macias Gil R, Marcelin JR, Zuniga-Blanco B, Marquez C, Mathew T, Piggott DA.  
197 COVID-19 Pandemic: Disparate Health Impact on the Hispanic/Latinx Population in the  
198 United States. J Infect Dis. 2020.

- 199 8. Hellewell J, Abbott S, Gimma A, et al. Feasibility of controlling COVID-19  
200 outbreaks by isolation of cases and contacts. *Lancet Glob Health*. 2020;8(4):e488-e96.
- 201 9. Allan-Blitz L-T, Klausner JD. Response to: Seroprevalence of SARS-CoV-2  
202 following the largest initial epidemic wave in the United States: Findings from New York  
203 City, May 13-July 21, 2020. *The Journal of Infectious Diseases*. 2021.
- 204 10. Cerami C, Rapp T, Lin FC, et al. High household transmission of SARS-CoV-2 in  
205 the United States: living density, viral load, and disproportionate impact on communities  
206 of color. *medRxiv*. 2021.
- 207 11. Burr JA, Mutchler JE, Gerst K. Patterns of residential crowding among Hispanics  
208 in later life: immigration, assimilation, and housing market factors. *J Gerontol B Psychol*  
209 *Sci Soc Sci*. 2010;65(6):772-82.
- 210 12. Ogedegbe G, Ravenell J, Adhikari S, et al. Assessment of Racial/Ethnic  
211 Disparities in Hospitalization and Mortality in Patients With COVID-19 in New York City.  
212 *JAMA Netw Open*. 2020;3(12):e2026881.
- 213 13. Anand S, Montez-Rath M, Han J, et al. Prevalence of SARS-CoV-2 antibodies in  
214 a large nationwide sample of patients on dialysis in the USA: a cross-sectional study.  
215 *Lancet*. 2020.
- 216 14. Chen YH GM, Riley A, Balmes J, Duchowny Kate, Harrison R, Matthay E,  
217 Bibbins-Domingo K. Excess mortality associated with the COVID-19 pandemic among  
218 Californians 18–65 years of age, by  
219 occupational sector and occupation: March through October 2020. *medRxiv*. Available  
220 at: <https://www.medrxiv.org/content/10.1101/2021.01.21.21250266v1.full.pdf>. 2021.

221 15. Kaiser Family Foundation. State reports of long-term care facility cases and  
222 deaths related to COVID-19 (as of October 16, 2020). Accessed October 17, 2020.  
223 Available at: [https://www.kff.org/health-costs/issue-brief/state-data-and-policy-actions-](https://www.kff.org/health-costs/issue-brief/state-data-and-policy-actions-to-address-coronavirus/#top)  
224 [to-address-coronavirus/#top](https://www.kff.org/health-costs/issue-brief/state-data-and-policy-actions-to-address-coronavirus/#top).

225

226

227

228 **Figure: New SARS-CoV-2 Infections Against Percent Vaccinated in California,**  
229 **January - March 2021**  
230

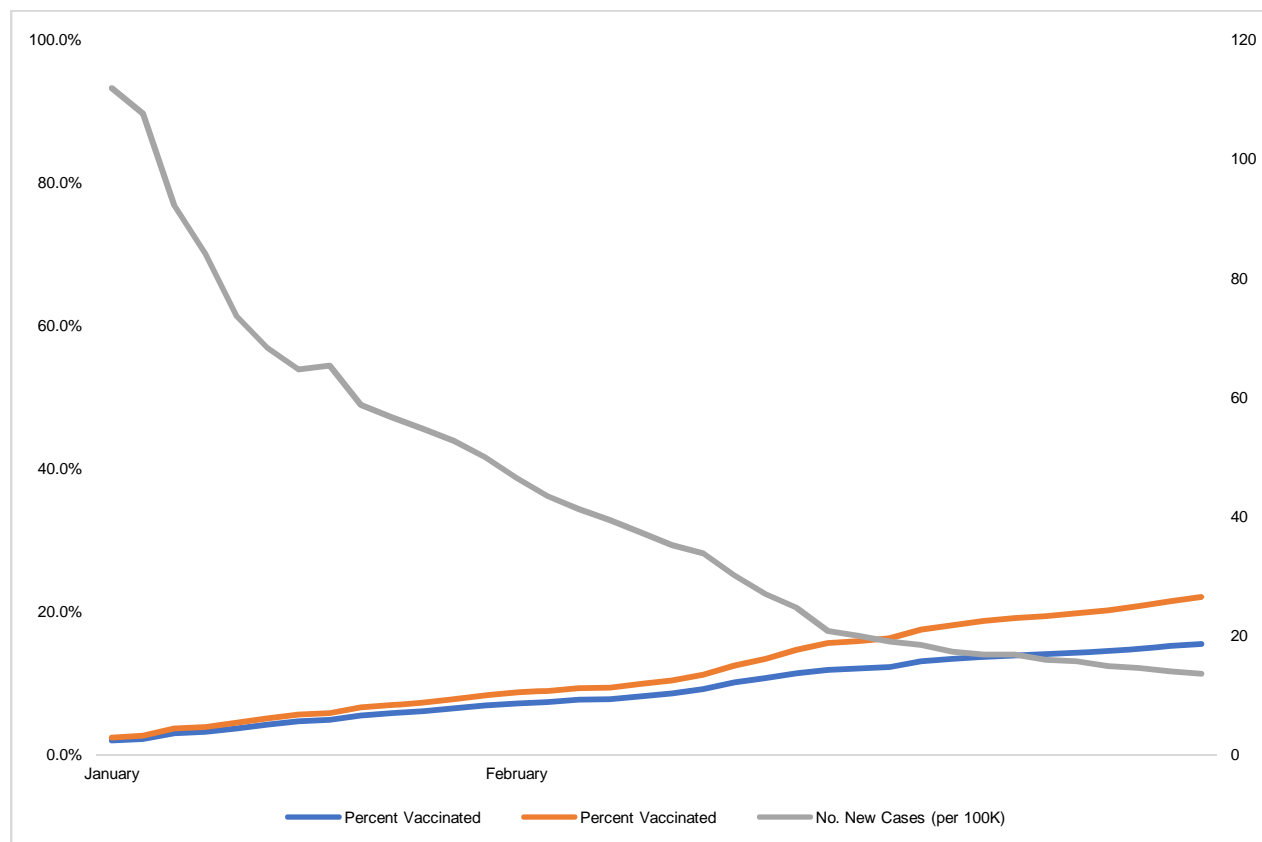

231  
232  
233 This is a figure shows percent vaccinated (by first and second dose) and new SARS-CoV-2 cases  
234 per 100,000 individuals in California between January to March 2021. Data extrapolated from  
235 U.S. COVID Risk & Vaccine Tracker (2).  
236

237 **Table: SARS-CoV-2 Positivity Among Hispanics Individuals From California**  
 238 **Comparing February 23rd - March 3rd and April 15th - April 30th, 2021**  
 239

|                                           | Hispanic Ethnicity |        |                         |       |                       |       |                   |        | Non-Hispanic Ethnicity |                         |       |                       |       |                   |  |  |
|-------------------------------------------|--------------------|--------|-------------------------|-------|-----------------------|-------|-------------------|--------|------------------------|-------------------------|-------|-----------------------|-------|-------------------|--|--|
|                                           | Total              |        | No. SARS-CoV-2 Positive |       | SARS-CoV-2 Positivity |       | Positivity Ratio  | Total  |                        | No. SARS-CoV-2 Positive |       | SARS-CoV-2 Positivity |       | Positivity Ratio  |  |  |
|                                           | Feb                | April  | Feb                     | April | Feb                   | April | February vs April | Feb    | April                  | Feb                     | April | Feb                   | April | February vs April |  |  |
| <b>Total</b>                              | 24929              | 30119  | 1907                    | 907   | 7.6%                  | 3.0%  | 2.5               | 27978  | 31763                  | 772                     | 672   | 2.8%                  | 2.1%  | 1.3               |  |  |
| <b>Age</b>                                |                    |        |                         |       |                       |       |                   |        |                        |                         |       |                       |       |                   |  |  |
| <18 years                                 | 2,889              | 8,264  | 341                     | 200   | 11.8%                 | 2.4%  | 4.9               | 3,573  | 8,081                  | 90                      | 106   | 2.5%                  | 1.3%  | 1.9               |  |  |
| 18-24 years                               | 4,424              | 5,713  | 281                     | 174   | 6.4%                  | 3.0%  | 2.1               | 3,509  | 3,868                  | 109                     | 101   | 3.1%                  | 2.6%  | 1.2               |  |  |
| 25-34 years                               | 6,865              | 6,770  | 442                     | 222   | 6.4%                  | 3.3%  | 2.0               | 7,642  | 6,493                  | 199                     | 207   | 2.6%                  | 3.2%  | 0.8               |  |  |
| 35-49 years                               | 5,914              | 5,530  | 419                     | 186   | 7.1%                  | 3.4%  | 2.1               | 7,126  | 7,146                  | 163                     | 135   | 2.3%                  | 1.9%  | 1.2               |  |  |
| 50-64 years                               | 3,865              | 3,002  | 345                     | 97    | 8.9%                  | 3.2%  | 2.8               | 4,758  | 4,543                  | 162                     | 92    | 3.4%                  | 2.0%  | 1.7               |  |  |
| ≥ 65 years                                | 970                | 840    | 79                      | 28    | 8.1%                  | 3.3%  | 2.4               | 1,370  | 1,632                  | 49                      | 31    | 3.6%                  | 1.9%  | 1.9               |  |  |
| <b>Gender</b>                             |                    |        |                         |       |                       |       |                   |        |                        |                         |       |                       |       |                   |  |  |
| Female                                    | 13,764             | 17,110 | 951                     | 462   | 6.9%                  | 2.7%  | 2.6               | 14,677 | 17,082                 | 350                     | 342   | 2.4%                  | 2.0%  | 1.2               |  |  |
| Male                                      | 11,111             | 12,947 | 954                     | 444   | 8.6%                  | 3.4%  | 2.5               | 13,212 | 14,610                 | 419                     | 328   | 3.2%                  | 2.2%  | 1.4               |  |  |
| <b>Heritage</b>                           |                    |        |                         |       |                       |       |                   |        |                        |                         |       |                       |       |                   |  |  |
| American Indian or Alaska Native          | 245                | 338    | 16                      | 4     | 6.5%                  | 1.2%  | 5.5               | 59     | 88                     | 5                       | 1     | 8.5%                  | 1.1%  | 7.5               |  |  |
| Black or African American                 | 203                | 251    | 11                      | 10    | 5.4%                  | 4.0%  | 1.4               | 3,322  | 4,486                  | 62                      | 145   | 1.9%                  | 3.2%  | 0.6               |  |  |
| Native Hawaiian or Another Pacific Island | 73                 | 70     | 10                      | 4     | 13.7%                 | 5.7%  | 2.4               | 354    | 442                    | 16                      | 12    | 4.5%                  | 2.7%  | 1.7               |  |  |
| Asian                                     | 95                 | 134    | 3                       | 0     | 3.2%                  | 0.0%  | *                 | 6,199  | 6,812                  | 159                     | 101   | 2.6%                  | 1.5%  | *                 |  |  |
| Multiracial                               | 401                | 514    | 18                      | 15    | 4.5%                  | 2.9%  | 1.5               | 805    | 1,022                  | 17                      | 19    | 2.1%                  | 1.9%  | 1.1               |  |  |
| White                                     | 5,365              | 6,756  | 330                     | 195   | 6.2%                  | 2.9%  | 2.1               | 14,920 | 16,071                 | 429                     | 316   | 2.9%                  | 2.0%  | 1.5               |  |  |
| Other/Prefer Not to Share                 | 16,820             | 20,072 | 1,450                   | 629   | 8.6%                  | 3.1%  | 2.8               | 1,346  | 1,123                  | 60                      | 59    | 4.5%                  | 5.3%  | 0.8               |  |  |
| <b>Employment</b>                         |                    |        |                         |       |                       |       |                   |        |                        |                         |       |                       |       |                   |  |  |
| Agricultural or Food Manufacturing Worker | 183                | 323    | 12                      | 10    | 6.6%                  | 3.1%  | 2.1               | 143    | 211                    | 4                       | 1     | 2.8%                  | 0.5%  | *                 |  |  |
| Construction Worker                       | 4                  | 9      | 0                       | 3     | 0.0%                  | 33.3% | 0.0               | 4      | 3                      | 0                       | 0     | 0.0%                  | 0.0%  | *                 |  |  |
| Correctional Facility                     | 41                 | 34     | 5                       | 3     | 12.2%                 | 8.8%  | 1.4               | 23     | 28                     | 1                       | 1     | 4.3%                  | 3.6%  | 1.2               |  |  |
| Delivery or Ride Share                    | 2                  | 6      | 0                       | 1     | 0.0%                  | 16.7% | 0.0               | 8      | 1                      | 1                       | 0     | 12.5%                 | 0.0%  | *                 |  |  |
| Disability Care Provider                  | 440                | 451    | 24                      | 25    | 5.5%                  | 5.5%  | 1.0               | 500    | 517                    | 11                      | 5     | 2.2%                  | 1.0%  | 2.3               |  |  |
| Education                                 | 1,160              | 3,812  | 44                      | 23    | 3.8%                  | 0.6%  | 6.3               | 1,886  | 3,694                  | 24                      | 36    | 1.3%                  | 1.0%  | 1.3               |  |  |
| Emergency Services                        | 213                | 253    | 10                      | 4     | 4.7%                  | 1.6%  | 3.0               | 216    | 263                    | 4                       | 4     | 1.9%                  | 1.5%  | 1.2               |  |  |
| First Responder                           | 5                  | 4      | 0                       | 0     | 0.0%                  | 0.0%  | *                 | 3      | 2                      | 0                       | 0     | 0.0%                  | 0.0%  | *                 |  |  |
| Food Services                             | 1,847              | 1,859  | 159                     | 68    | 8.6%                  | 3.7%  | 2.4               | 1,317  | 1,295                  | 52                      | 51    | 3.9%                  | 3.9%  | 1.0               |  |  |
| Government Personnel                      | 5                  | 4      | 0                       | 0     | 0.0%                  | 0.0%  | *                 | 2      | 2                      | 0                       | 0     | 0.0%                  | 0.0%  | *                 |  |  |
| Grocery Store Worker                      | 8                  | 3      | 0                       | 0     | 0.0%                  | 0.0%  | *                 | 3      | 3                      | 0                       | 0     | 0.0%                  | 0.0%  | *                 |  |  |
| Healthcare Worker                         | 1,338              | 1,779  | 62                      | 34    | 4.6%                  | 1.9%  | 2.4               | 1,812  | 2,182                  | 37                      | 28    | 2.0%                  | 1.3%  | 1.6               |  |  |
| Members of the Media                      | 0                  | 0      | 0                       | *     | *                     | *     | *                 | 2      | 1                      | 0                       | 0     | 0.0%                  | 0.0%  | *                 |  |  |

|                                            |        |        |     |     |       |       |     |        |        |     |     |       |       |     |
|--------------------------------------------|--------|--------|-----|-----|-------|-------|-----|--------|--------|-----|-----|-------|-------|-----|
| Public Transportation                      | 198    | 248    | 10  | 8   | 5.1%  | 3.2%  | 1.6 | 178    | 255    | 6   | 4   | 3.4%  | 1.6%  | 2.1 |
| Retail or Manufacturing                    | 1,698  | 1,480  | 141 | 58  | 8.3%  | 3.9%  | 2.1 | 1,116  | 890    | 44  | 23  | 3.9%  | 2.6%  | 1.5 |
| <b>Public Exposures</b>                    |        |        |     |     |       |       |     |        |        |     |     |       |       |     |
| Bars                                       | 136    | 338    | 0   | 2   | 0.0%  | 0.6%  | 0.0 | 311    | 625    | 3   | 11  | 1.0%  | 1.8%  | 0.5 |
| Restaurants                                | 1,269  | 3,232  | 13  | 32  | 1.0%  | 1.0%  | 1.0 | 3,168  | 5,446  | 17  | 29  | 0.5%  | 0.5%  | 1.0 |
| Gas Stations                               | 2,076  | 2,908  | 46  | 21  | 2.2%  | 0.7%  | 3.1 | 3,990  | 4,750  | 25  | 39  | 0.6%  | 0.8%  | 0.8 |
| Public Park                                | 1,006  | 2,704  | 13  | 24  | 1.3%  | 0.9%  | 1.5 | 3,337  | 4,877  | 12  | 18  | 0.4%  | 0.4%  | *   |
| Retail Store                               | 1,785  | 3,862  | 34  | 36  | 1.9%  | 0.9%  | 2.0 | 3,739  | 5,744  | 17  | 31  | 0.5%  | 0.5%  | 0.8 |
| Grocery Store                              | 3,603  | 6,457  | 78  | 65  | 2.2%  | 1.0%  | 2.2 | 6,864  | 9,132  | 42  | 62  | 0.6%  | 0.7%  | 0.9 |
| Place of Work                              | 869    | 1,204  | 23  | 7   | 2.6%  | 0.6%  | 4.6 | 1,346  | 1,705  | 7   | 12  | 0.5%  | 0.7%  | 0.7 |
| Public Transit                             | 413    | 954    | 4   | 9   | 1.0%  | 0.9%  | 1.0 | 863    | 1,237  | 4   | 15  | 0.5%  | 1.2%  | 0.4 |
| Place of Worship                           | 243    | 549    | 4   | 3   | 1.6%  | 0.5%  | 3.0 | 236    | 512    | 1   | 1   | 0.4%  | 0.2%  | *   |
| <b>Known COVID Contact in Last 14 days</b> |        |        |     |     |       |       |     |        |        |     |     |       |       |     |
| No                                         | 17,039 | 24,551 | 952 | 503 | 5.6%  | 2.0%  | 2.7 | 22,315 | 27,490 | 382 | 349 | 1.7%  | 1.3%  | 1.3 |
| Yes                                        | 5,812  | 3,917  | 934 | 400 | 16.1% | 10.2% | 1.6 | 3,662  | 2,980  | 375 | 315 | 10.2% | 10.6% | 1.0 |
